# Supplementary material
Source: publisher site journal article supplement (http://www.kjim.org/upload/media/kjim-2023-167-Supplementary-Table-1.pdf)
Supplement: Supplementary file 1 [file kjim-2023-167-Supplementary-Table-1.pdf]

**Supplementary Table 1. Definition and assessment of histologic items**

| Histologic feature                                                                                              | Score 0     | Score 1                       | Score 2              | Score 3              |
|-----------------------------------------------------------------------------------------------------------------|-------------|-------------------------------|----------------------|----------------------|
| Chronic inflammatory infiltrate (quantity of lymphocytes and plasmacytes in the biopsy specimen)                | No increase | Mild but unequivocal increase | Moderate increase    | Marked increase      |
| Neutrophils in the epithelium                                                                                   | None        | < 50% crypt involved          | > 50% crypt involved |                      |
| Ulceration (visible epithelial injury and regeneration and/or fibrin and neutrophils and/or tissue granulation) | Absent      | Present                       |                      |                      |
| Acute inflammatory cell infiltrate                                                                              | None        | Mild                          | Moderate             | Severe               |
| Mucin depletion                                                                                                 | None        | Mild                          | Moderate             | Severe               |
| Neutrophils in lamina propria                                                                                   | None        | Mild                          | Moderate             | Severe               |
| Basal plasmacytosis                                                                                             | None        | Mild                          | Moderate             | Severe               |
| Serrated architectural abnormalities (presence of dilated crypts showing a scalloped lumen)                     | None        | < 5% crypt involved           | < 50% crypt involved | > 50% crypt involved |
